# Supplementary material for: Modeling Potential C, N, H Content in Aboveground Biomass with Spectral Data from Sentinel 2a
Source: Preprints.org preprint supplement (doi:10.20944/preprints202003.0187.v1), 2020-03-11
Supplement: Supplementary file 3 [file supplementary]

## Sheet: GENERAL 
TREATMENT	Species	Silvicultural regime	COMP	SITE	Carbon M	Nitrogen M	Hydrogen M	BIOMASS	Carbon	Nitrogen	Hydrogen
1	P chiapensis	Ac	ARBO	1	41.645	0.285	5.88	58.8759	24.5189	0.167796	3.4619
1	P patula	Ac	ARBO	1	42.62	0.18	5.74	94.2015	40.1487	0.169563	5.40716
1	Quercus castanea	Ac	ARBO	1	42.26	0.45	5.525	3.00025	1.26791	0.0135011	0.165764
1	P chiapensis	Ac	ARBO	2	41.645	0.285	5.88	4.92692	2.05181	0.0140417	0.289703
1	Pinus douglasiana	Ac	ARBO	2	42.255	0.135	5.095	4.92692	2.08187	0.00665134	0.251026
1	P patula	Ac	ARBO	2	42.62	0.18	5.74	4.92692	2.09985	0.00886845	0.282805
1	Quercus castanea	Ac	ARBO	2	42.26	0.45	5.525	4.92692	2.08211	0.0221711	0.272212
1	P chiapensis	Ac	ARBO	3	41.645	0.285	5.88	78.8093	32.8201	0.224606	4.63399
1	P patula	Ac	ARBO	3	42.62	0.18	5.74	69.5376	29.6369	0.125168	3.99146
2	Litsea glaucescens	Ac1	ARBO	1	40.7	0.3	5.35	0.0544728	0.0221704	0.000163418	0.00291429
2	Pinus douglasiana	Ac1	ARBO	1	42.255	0.135	5.095	19.5561	8.26342	0.0264007	0.996382
2	Quercus laurina	Ac1	ARBO	1	44.65	0.28	6.055	119.509	53.3609	0.334626	7.23629
2	Quercus rugosa	Ac1	ARBO	1	42.375	0.57	5.79	0.0969032	0.0410627	0.000552348	0.0056107
2	Litsea glaucescens	Ac1	ARBO	2	40.7	0.3	5.35	0.0141836	0.00577272	4.25507e-05	0.000758821
2	P chiapensis	Ac1	ARBO	2	41.645	0.285	5.88	29.5065	12.288	0.0840936	1.73498
2	Pinus douglasiana	Ac1	ARBO	2	42.255	0.135	5.095	49.0167	20.712	0.0661726	2.4974
2	Quercus laurina	Ac1	ARBO	2	44.65	0.28	6.055	16.9023	7.54688	0.0473265	1.02344
2	Saurauia scabrida	Ac1	ARBO	2	40.37	0.465	5.96	0.187482	0.0756865	0.000871792	0.0111739
2	Litsea glaucescens	Ac1	ARBO	3	40.7	0.3	5.35	0.244013	0.0993133	0.000732039	0.0130547
2	P chiapensis	Ac1	ARBO	3	41.645	0.285	5.88	1.57345	0.655263	0.00448433	0.0925188
2	Pinus douglasiana	Ac1	ARBO	3	42.255	0.135	5.095	24.2513	10.2474	0.0327392	1.2356
2	pinus maximinoi	Ac1	ARBO	3	43.045	0.165	3.91	0.179708	0.0773553	0.000296518	0.00702658
2	Quercus laurina	Ac1	ARBO	3	44.65	0.28	6.055	19.1989	8.57233	0.053757	1.1625
2	Saurauia scabrida	Ac1	ARBO	3	40.37	0.465	5.96	0.249029	0.100533	0.00115799	0.0148421
3	Alnus acuminata	CR	ARBO	1	42.605	0.295	4.85	6.16761	2.62771	0.0181944	0.299129
3	Pinus douglasiana	CR	ARBO	1	42.255	0.135	5.095	14.5641	6.15405	0.0196615	0.742039
3	Quercus castanea	CR	ARBO	1	42.26	0.45	5.525	12.1367	5.12898	0.0546152	0.670554
3	Quercus laurina	CR	ARBO	1	44.65	0.28	6.055	7.28203	3.25143	0.0203897	0.440927
3	Alnus acuminata	CR	ARBO	2	42.605	0.295	4.85	0.108071	0.0460434	0.000318808	0.00524142
3	Litsea glaucescens	CR	ARBO	2	40.7	0.3	5.35	5.19549	2.11456	0.0155865	0.277959
3	Pinus douglasiana	CR	ARBO	2	42.255	0.135	5.095	4.73111	1.99913	0.006387	0.24105
3	Quercus castanea	CR	ARBO	2	42.26	0.45	5.525	15.5865	6.58684	0.0701391	0.861152
3	Quercus laurina	CR	ARBO	2	44.65	0.28	6.055	42.0835	18.7903	0.117834	2.54815
3	Litsea glaucescens	CR	ARBO	3	40.7	0.3	5.35	0.318799	0.129751	0.000956397	0.0170558
3	P chiapensis	CR	ARBO	3	41.645	0.285	5.88	7.03092	2.92803	0.0200381	0.413418
3	Pinus douglasiana	CR	ARBO	3	42.255	0.135	5.095	13.602	5.7475	0.0183626	0.693019
3	Quercus castanea	CR	ARBO	3	42.26	0.45	5.525	0.136841	0.0578289	0.000615783	0.00756045
3	Quercus laurina	CR	ARBO	3	44.65	0.28	6.055	28.104	12.5484	0.0786912	1.7017
3	Tilia mexicana	CR	ARBO	3	44.26	0.11	5.535	6.38728	2.82701	0.007026	0.353536
4	Quercus castanea	Selp	ARBO	1	42.26	0.45	5.525	38.8487	16.4174	0.174819	2.14639
4	P chiapensis	Selp	ARBO	1	41.645	0.285	5.88	2.64549	1.10171	0.00753965	0.155555
4	Pinus douglasiana	Selp	ARBO	1	42.255	0.135	5.095	16.1869	6.83979	0.0218524	0.824725
4	Tilia mexicana	Selp	ARBO	1	44.26	0.11	5.535	0.886987	0.39258	0.000975685	0.0490947
4	P chiapensis	Selp	ARBO	2	41.645	0.285	5.88	8.17752	3.40553	0.0233059	0.480838
4	Pinus douglasiana	Selp	ARBO	2	42.255	0.135	5.095	12.2658	5.1829	0.0165588	0.62494
4	Quercus castanea	Selp	ARBO	2	42.26	0.45	5.525	8.17752	3.45582	0.0367989	0.451808
4	Tilia mexicana	Selp	ARBO	2	44.26	0.11	5.535	8.17752	3.61937	0.00899528	0.452626
4	P chiapensis	Selp	ARBO	3	41.645	0.285	5.88	18.6989	7.78714	0.0532918	1.09949
4	Pinus douglasiana	Selp	ARBO	3	42.255	0.135	5.095	19.0289	8.04065	0.025689	0.969521
4	Quercus castanea	Selp	ARBO	3	42.26	0.45	5.525	5.64065	2.38374	0.0253829	0.311646
4	Tilia mexicana	Selp	ARBO	3	44.26	0.11	5.535	1.42422	0.630359	0.00156664	0.0788305
5	Litsea glaucescens	Selps	ARBO	1	40.7	0.3	5.35	0.0651737	0.0265257	0.000195521	0.00348679
5	P chiapensis	Selps	ARBO	1	41.645	0.285	5.88	12.0168	5.00439	0.0342478	0.706587
5	Pinus douglasiana	Selps	ARBO	1	42.255	0.135	5.095	19.6509	8.30347	0.0265287	1.00121
5	Quercus laurina	Selps	ARBO	1	44.65	0.28	6.055	6.51038	2.90688	0.0182291	0.394204
5	P chiapensis	Selps	ARBO	2	41.645	0.285	5.88	2.0851	0.868338	0.00594252	0.122604
5	Pinus douglasiana	Selps	ARBO	2	42.255	0.135	5.095	37.0297	15.6469	0.0499901	1.88666
5	Pinus maximinoi	Selps	ARBO	2	43.045	0.165	3.91	5.22734	2.25011	0.00862511	0.204389
5	Quercus castanea	Selps	ARBO	2	42.26	0.45	5.525	7.6472	3.23171	0.0344124	0.422508
5	Quercus laurina	Selps	ARBO	2	44.65	0.28	6.055	16.6695	7.44294	0.0466746	1.00934
5	Litsea glaucescens	Selps	ARBO	3	40.7	0.3	5.35	0.370656	0.150857	0.00111197	0.0198301
5	P chiapensis	Selps	ARBO	3	41.645	0.285	5.88	7.37865	3.07284	0.0210291	0.433864
5	Pinus douglasiana	Selps	ARBO	3	42.255	0.135	5.095	31.7435	13.4132	0.0428537	1.61733
5	Quercus laurina	Selps	ARBO	3	44.65	0.28	6.055	24.7229	11.0388	0.0692242	1.49697

## Sheet: BY SP
	Species	BIOMASS	CARBON	NITROGEN	HYDROGEN	PIXEL
	Alnus	6.276	2.68	0.018	0.3043	0.71
	litsea	6.262	2.55	0.018	0.3352	0.73
	patula	168.666	71.89	0.303	9.6815	0.78
	Pchia	231.726	96.51	0.66	13.6255	0.87
	pima	5.407	2.33	0.008	0.2114	0.71
	Pindo	266.554	112.62	0.901	13.5807	0.86
	qcas	96.102	40.62	0.232	5.3097	0.7
	qlau	280.982	125.46	0.786	17.0135	0.88
	qrug	0.097	0.04	0.0006	0.0056	0.72
	Saura	0.436	0.18	0.0021	0.026	0.73
	tilia	16.876	7.47	0.0186	0.934	0.68

## Sheet: Carbon
Regresión lineal 22:56 Friday, October 1, 2019 1
The REG Procedure
Model: MODEL1
Dependent Variable: PIXEL
Analysis of Variance
Sum of Mean
Source DF Squares Square F Value Pr > F
Model 1 0.04746 0.04746 54.56 <.0001
Error 9 0.00783 0.00086989
Corrected Total 10 0.05529
Root MSE 0.02949 R-Square 0.8584
Dependent Mean 0.76091 Adj R-Sq 0.8427
Coeff Var 3.87615
Parameter Estimates
Parameter Standard
Variable DF Estimate Error t Value Pr > |t|
Intercept 1 0.70322 0.01184 59.42 <.0001
CARBONO 1 0.00137 0.00018580 7.39 <.0001

## Sheet: Nitrogen
Regresión lineal 22:56 Friday, October 1, 2019 2
The REG Procedure
Model: MODEL1
Dependent Variable: PIXEL
Analysis of Variance
Sum of Mean
Source DF Squares Square F Value Pr > F
Model 1 0.04834 0.04834 62.59 <.0001
Error 9 0.00695 0.00077236
Corrected Total 10 0.05529
Root MSE 0.02779 R-Square 0.8743
Dependent Mean 0.76091 Adj R-Sq 0.8603
Coeff Var 3.65240
Parameter Estimates
Parameter Standard
Variable DF Estimate Error t Value Pr > |t|
Intercept 1 0.70762 0.01075 65.82 <.0001
NITROGENO 1 0.19887 0.02514 7.91 <.0001

## Sheet: Hydrogen
Regresión lineal 22:56 Friday, October 1, 2019 4
The NLIN Procedure
Dependent Variable PIXEL
Method: Gauss-Newton
Iterative Phase
Sum of
Iter B0 B1 Squares
0 0.0104 0.7034 2704338
1 0.000297 0.7017 2010.4
2 0.000304 0.6427 267.1
3 0.000676 0.5149 15.7684
4 0.00384 0.1923 5.9919
5 0.3365 -4.6056 5.3317
6 0.3753 -1.8281 4.7328
7 0.4404 -0.4743 3.9656
8 0.4628 -0.1159 2.8737
9 0.5174 0.0178 0.3878
10 0.6914 0.0125 0.0109
11 0.7037 0.0134 0.00702
12 0.7036 0.0134 0.00702
13 0.7036 0.0134 0.00702
NOTE: Convergence criterion met.
Estimation Summary
Method Gauss-Newton
Iterations 13
Subiterations 7
Average Subiterations 0.538462
R 2.377E-7
PPC(B1) 8.846E-8
RPC(B1) 0.00001
Object 7.41E-10
Objective 0.007016
Observations Read 11
Observations Used 11
Observations Missing 0
NOTE: An intercept was not specified for this model.
Sum of Mean Approx
Source DF Squares Square F Value Pr > F
Model 2 6.4171 3.2085 4116.08 <.0001
Error 9 0.00702 0.000780
Uncorrected Total 11 6.4241
_x000C_
Regresión lineal 22:56 Friday, October 1, 2019 5
The NLIN Procedure
Approx
Parameter Estimate Std Error Approximate 95% Confidence Limits
B0 0.7036 0.0110 0.6787 0.7286
B1 0.0134 0.00167 0.00966 0.0172
Approximate Correlation Matrix
B0 B1
B0 1.0000000 -0.7106862
B1 -0.7106862 1.0000000

## Sheet: Biomass
Regresión lineal 22:56 Friday, October 1, 2019 3
The REG Procedure
Model: MODEL1
Dependent Variable: PIXEL
Analysis of Variance
Sum of Mean
Source DF Squares Square F Value Pr > F
Model 1 0.04752 0.04752 55.04 <.0001
Error 9 0.00777 0.00086339
Corrected Total 10 0.05529
Root MSE 0.02938 R-Square 0.8595
Dependent Mean 0.76091 Adj R-Sq 0.8438
Coeff Var 3.86164
Parameter Estimates
Parameter Standard
Variable DF Estimate Error t Value Pr > |t|
Intercept 1 0.70288 0.01182 59.47 <.0001
BIOM 1 0.00059142 0.00007972 7.42 <.0001
